# Supplementary material for: Ezrin Regulates the Cell Surface Localization of PD-L1 in HEC-151 Cells
Source: MDPI journal article supplement (doi:10.3390/jcm11082226), 2022-04-15
Supplement: s1 [file s1]

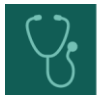

*Supplementary Materials*

# Ezrin Regulates the Cell Surface Localization of PD-L1 in HEC-151 Cells

Chihiro Tanaka <sup>1,†</sup>, Takuro Kobori <sup>1,†</sup>, Rie Okada <sup>1</sup>, Rina Doukuni <sup>1</sup>, Mayuka Tameishi <sup>1</sup>, Yoko Urashima <sup>1</sup>, Takuya Ito <sup>2</sup>, Nobumasa Takagaki <sup>3</sup>, and Tokio Obata <sup>1,\*</sup>

<sup>1</sup> Laboratory of Clinical Pharmaceutics, Faculty of Pharmacy, Osaka Ohtani University, Tondabayashi, 584-8540 Japan; u4117078@osaka-ohtani.ac.jp (C.T.); koboritaku@osaka-ohtani.ac.jp (T.K.); u4118025@osaka-ohtani.ac.jp (R.O.); u4118098@osaka-ohtani.ac.jp (R.D.); u4117083@osaka-ohtani.ac.jp (M.T.); urasiyo@osaka-ohtani.ac.jp (Y.U.)

<sup>2</sup> Laboratory of Natural Medicines, Faculty of Pharmacy, Osaka Ohtani University, Tondabayashi, 584-8540 Japan; itoutaku@osaka-ohtani.ac.jp (T.I.)

<sup>3</sup> Nobumasa Clinic, Kyoto, 601-8041 Japan; nobukin555@gmail.com (N.T.)

\* Correspondence: obatatoki@osaka-ohtani.ac.jp (T.O.);  
Tel.: +81-721-24-9371 (T.O.)

† These authors contributed equally to this work.

Original source images for immunoblots.

### PD-L1

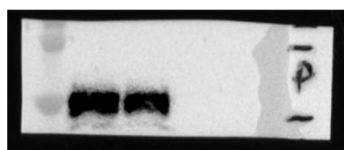

Figure 1c

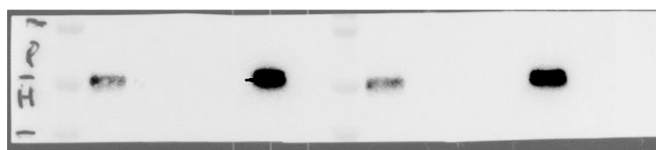

Figure 4

### Ezrin

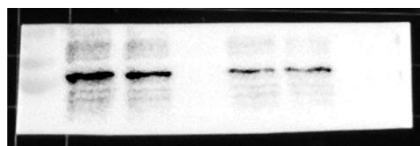

Figure 1c

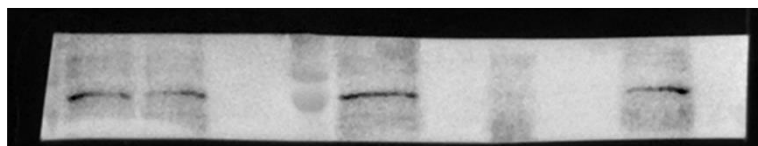

Figure 4

### Radixin

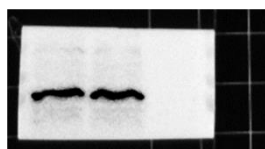

Figure 1c

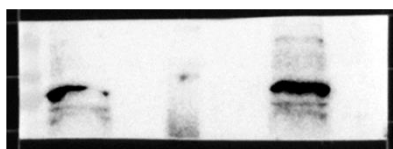

Figure 4

### Moesin

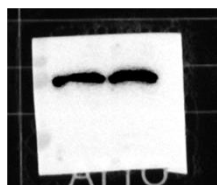

Figure 1c

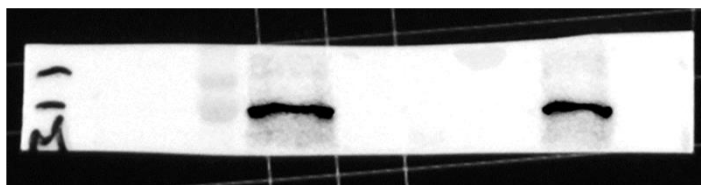

Figure 4

### GAPDH

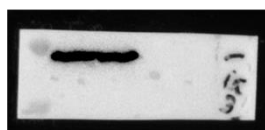

Figure 1c  
(PD-L1)

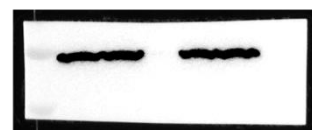

Figure 1c  
(Ezrin)

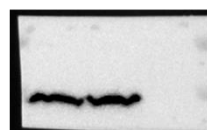

Figure 1c  
(Radixin)

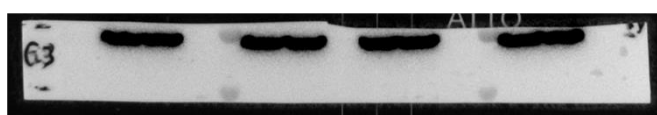

Figure 1c  
(Moesin)

**Figure S1.** Original source images for immunoblots. The original western blotting membrane to detect the protein expression of programmed death ligand-1 (PD-L1), ezrin, radixin, and moesin as well as the corresponding glyceraldehyde-3-phosphate dehydrogenase (GAPDH) used as a loading control shown in Figure 1c or Figure 4. Blots are labeled according to the corresponding Figure panel within the main manuscript.

**RNA interference-mediated knockdown of target genes in HEC-151 cells.**

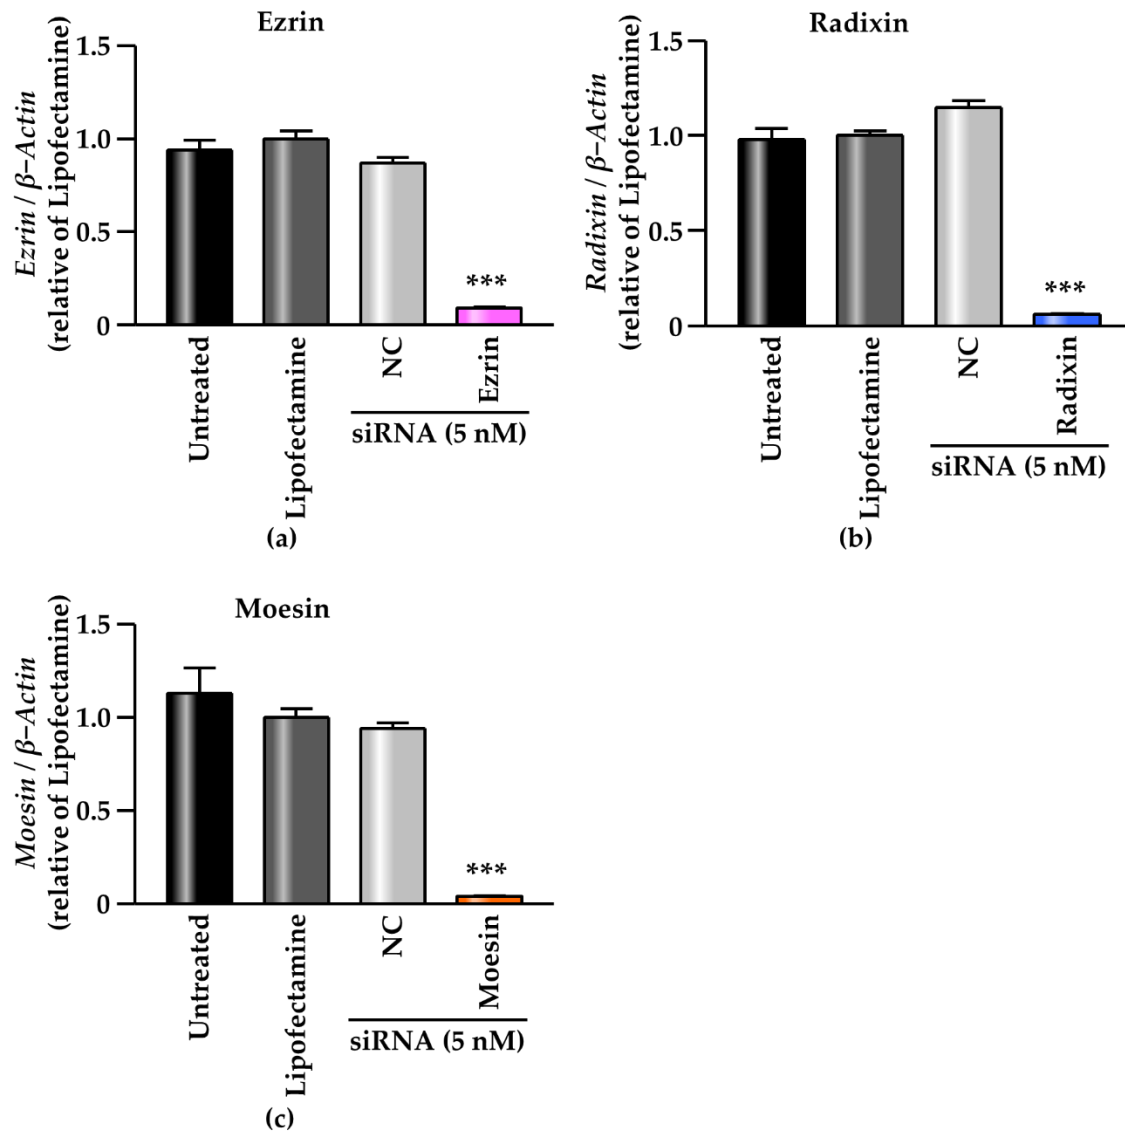

**Figure S2.** RNA interference-mediated knockdown of target genes in HEC-151 cells. Cells were treated with the transfection medium (Untreated), transfection reagent (Lipofectamine), nontargeting control (NC) siRNA, and specific siRNAs for ezrin, radixin, or moesin at the concentrations of 5 nM, and then cultured for 4 days. Each column shows the mRNA expression levels of (a) ezrin, (b) radixin, and (c) moesin normalized with  $\beta$ -Actin in cells from each treatment group relative to that in cells treated with Lipofectamine alone as determined by real-time reverse transcription-polymerase chain reaction.  $n = 3$ , \*\*\* $p < 0.001$  vs. Lipofectamine. All data were expressed as the mean  $\pm$  SEM and analyzed by one-way ANOVA followed by Dunnett's test.

**Table S1.** List of primers used in the present study.

| Gene                       | Primer sequence (5'→3')   |
|----------------------------|---------------------------|
| <i>h-β-Actin</i> (forward) | TGGCACCCAGCACAATGAA       |
| <i>h-β-Actin</i> (reverse) | CTAAGTCATAGTCCGCCTAGAAGCA |
| <i>h-Ezrin</i> (forward)   | ACCATGGATGCAGAGCTGGAG     |
| <i>h-Ezrin</i> (reverse)   | CATAGTGGAGGCCAAAGTACCACA  |
| <i>h-Radixin</i> (forward) | GAATTTGCCATTTCAGCCCAATA   |
| <i>h-Radixin</i> (reverse) | GCCATGTAGAATAACCTTTGCTGTC |
| <i>h-Moesin</i> (forward)  | CCGAATCCAAGCCGTGTGTA      |
| <i>h-Moesin</i> (reverse)  | GGCAAACCTCCAGCTCTGCATC    |
| <i>h-PD-L1</i> (forward)   | CAATGTGACCAGCACACTGAGAA   |
| <i>h-PD-L1</i> (reverse)   | GGCATAATAAGATGGCTCCCAGAA  |

**Table S2.** List of antibodies used in the present study.

| Antibodies                                      | Source                    | Cat#      | Dilution                   |
|-------------------------------------------------|---------------------------|-----------|----------------------------|
| rabbit anti-ezrin                               | Cell Signaling Technology | 3145      | 1:2,000 (WB)<br>1:50 (IF)  |
| rabbit anti-radixin                             | Gene Tex                  | GTX105408 | 1:2,000 (WB)<br>1:100 (IF) |
| rabbit anti-moesin                              | Cell Signaling Technology | 3150      | 1:2,000 (WB)<br>1:50 (IF)  |
| Alexa Fluor 488-conjugated rabbit anti-PD-L1    | Cell Signaling Technology | 25048     | 1:50 (IF)                  |
| Alexa Fluor 488-conjugated goat anti-rabbit IgG | Thermo Fisher Scientific  | R37116    | 1:25 (IF)                  |
| Alexa Fluor 594-conjugated goat anti-rabbit IgG | Thermo Fisher Scientific  | R37117    | 1:25 (IF)                  |
| HRP-conjugated rabbit anti-PD-L1                | Cell Signaling Technology | 51296s    | 1:1,000 (WB)               |
| mouse anti-GAPDH                                | Merck                     | MAB374    | 1:20,000 (WB)              |
| HRP-conjugated anti-rabbit IgG (heavy + light)  | SeraCare Life Sciences    | 5220-0336 | 1:10,000 (WB)              |
| HRP-conjugated anti-mouse IgG (heavy + light)   | SeraCare Life Sciences    | 5220-0341 | 1:10,000 (WB)              |
| rabbit anti-PD-L1                               | Cell Signaling Technology | 13684     | 1:30 (IP)                  |
| rabbit IgG isotype control                      | Cell Signaling Technology | 3900      | 1:30 (IP)                  |
| APC-conjugated mouse anti-human PD-L1           | BioLegend                 | 329708    | 4.0 µg/test (FC)           |

western blotting; WB, immunofluorescence; IF, immunoprecipitation; IP, flow cytometry; FC, horseradish peroxidase; HRP, allophycocyanin; APC
